# Supplementary material for: Optimization of the Extraction of the Volatile Fraction from Honey Samples by SPME-GC-MS, Experimental Design, and Multivariate Target Functions
Source: Hindawi journal article supplement (doi:10.1155/2017/6437857), 2017-01-01
Supplement: f1 [file 6437857.f1.docx]

**Table S1**. List of the principal compounds identified in multiflower honey samples with their retention times. Experimental conditions were reported in the text.

| **tr (min)** | **Nome** |
| --- | --- |
| 1.296 | Dimethylamine |
| 1.453 | 2-Propanol, 1-methoxy- |
| 1.617 | Dimethylsulfide |
| 1.760 | Propanal, 2-methyl |
| 1.967 | Furan, 2-methyl |
| 2.398 | Butanal, 3-methyl |
| 2.448 | 1-Butanol |
| 2.478 | Butanal, 2-methyl |
| 2.718 | Silanediol |
| 2.801 | Hexane, 3-methyl- |
| 2.830 | Furan, 2-ethyl- |
| 2.913 | Furan, 2,5-dimethyl-, |
| 3.279 | 3-Buten-1-ol, 3-methyl |
| 3.503 | Disulfide, dimethyl |
| 4.451 | Hexane,2,4-dimethyl |
| 4.725 | Benzenamine, 4,4-(1,2-ethenediyl)bis- |
| 5.140 | Phenol, 3-methyl |
| 5.236 | Furfural |
| 5.586 | Butanoic acid, 2-methyl-, ethylester |
| 5.721 | 2-Furanmethanol |
| 5.881 | Ethylbenzene |
| 6.769 | Oxime-, methoxy- phenyl |
| 6.951 | Heptanal |
| 7.177 | Ethanone,1-(2-furanyl)- |
| 7.254 | 1-Pentanamine |
| 8.149 | 3-Oxatricyclo[4.1.1.0(2,4)]octane, 2,7,7-trimethyl- |
| 8.713 | Hex-2-yn-4-one, 2-methyl- |
| 9.022 | Benzaldehyde |
| 9.921 | 5-Hepten-2-one-6-methyl |
| 11.125 | Acetaldehyde, (3,3-dimethylcyclohexylidene)- |
| 11.382 | Benzene, 1-ethyl-3-methyl- |
| 11.511 | 1,3-Cyclohexadiene,1-methyl-4-(1-methylethyl)- |
| 11.588 | 2,8-decadiyne |
| ~~11.795~~ | Benzene,1-metoxy-4-methyl- |
| 11.952 | Benzene, 1-methyl-3-(1-methylethyl)- |
| 12.253 | Limonene |
| 12.313 | 3-ethyl-5-methyl-1-heptyn-3-ol |
| 12.424 | Eucalyptol |
| 12.669 | Benzyl Alcohol |
| 12.846 | 2(3H)-Furanone, 5-ethenyldihydro-5-methyl- |
| 13.309 | Benzeneacetaldehyde |
| 14.232 | τ-Terpinene |
| 14.393 | 2-Octenal |
| 15.241 | Trans-Linalool oxide |
| 15.466 | 1-Octanol |
| 15.891 | 9-Oxadicyclo[6.1.0]nonane |
| 16.468 | α-Terpinene |
| 16.660 | cis-Linalooloxide |
| 17.001 | Benzene,1-methyl-4-(1-methyletheny) |
| 17.211 | 2-Nonanone |
| 18.238 | Linalylanthranilate |
| 18.512 | Hotrienol |
| 19.424 | Phenylethylalcohol |
| 22.899 | Lilac aldehyde |
| 23.177 | Camphor |
| 23.177 | 2,6,6-Trimethyl-2-cyclohexene-1,4-dione |
| 23.600 | Lilac aldehyde |
| 23.892 | 2H-Pyran,3,6-dihydro-4-methyl-2-(2-methyl-1-propenyl) |
| 24.694 | Menthofuran |
| 24.917 | Lilac aldehyde |
| 26.577 | Benzenemethanol, α, α, 4-trimethyl |
| 27.061 | Terpineol |
| 28.364 | 3-cyclohexene-1-acetaldehyde, α, 4-dimethyl- |
| 28.462 | Cinnamaldehyde |
| 30.016 | Benzeneacetic acid ethylester |
| 30.283 | 1-Cyclohexene-1-methanol, 4-(1-methylethenyl)- |
| 30.465 | Thymoquinone |
| 30.770 | Geraniol |
| 32.133 | 2-Propenal, 3-phenyl- |
| 33.696 | p-Mentha-1(7)8(10)-dien-9-ol |
| 34.081 | Thymol |
| 38.274 | Benzoic acid, 2-amino-, methylester |
| 39.618 | Eugenol |
| 40.512 | Toluene, m-tert-butyl- |
| 42.931 | 2-Buten-1-one, 1-(2,6,6-trimethyl-1,3-cyclohexandien-1-yl)- |
| 45.390 | Benzoic acid, 2-(methylamino)-methylester |
| 46.046 | Oxirane, tetradecyl- |
| 47.581 | 2-fluorobenzoic acid, 4-nitrophenylester |
| 47.919 | 5,9-Undecadien-2-one,6,10-dimethyl |
| 48.257 | 2,5-Cyclohexadiene-1,4-dione,2,6-bis(1,1-dimethylethyl) |
| 48.647 | Cinnamic acid, ethylester |
| 48.977 | 1,3,7,7-Tetramethyl-9-oxo-2-oxabicyclo(4,4,0)dec-5-ene |
| 49.822 | 2,5-di-tert-butyl-1,4-benzoquinone |
| 50.118 | Phenol,2,5-bis(1,1-dimethylethyl) |
| 51.370 | 1-Octanol,2-butyl |
| 51.452 | Caryophyllene oxide |
| 51.577 | Nerolidol |
| 52.223 | 2,2,4-trimethyl-1,3-pentanedioldiisobutyrate |
| 53.267 | α-Gurjunene |
| 53.473 | β-Gurjunene |
| 54.129 | Phenol, 2,6-bis(1,1-dimethylethyl)-4-(1-methylpropyl)- |
| 54.363 | Bisabolol |
| 55.353 | 2-Bromononane |
| 57.204 | 5-Cyclohexadecen-1-one |
| 57.366 | Dibutylphthalate |
| 58.803 | Dibutylphthalate |
| 59.734 | 1,6,10,14-hexadecatetraen-3-ol, 3,7,11,15-tetramethyl- |
| 64.358 | 2H-Chromene-3-carboxylic acid, 6-nitro-2-oxo-,(1-ethyl-1-methylprop-2-ynyl)amide |
